# Supplementary material for: Evidence Map of Cupping Therapy
Source: MDPI journal article supplement (doi:10.3390/jcm10081750), 2021-04-17
Supplement: s1 [file s1]

## **Supplement 1. Search strategy**

### **1. PubMed database**

1. Cupping [Mesh]
2. Cupping [Title/Abstract]
3. cups [Title/Abstract]
4. "Meta-Analysis" [Publication Type]
5. "meta-analysis" [Title/Abstract]
6. "systematic review" [Title/Abstract]
7. OR/1-3
8. OR/4-6
9. 7 AND 8

### **2. CNKI Chinese database**

1. 拔罐
2. 火罐
3. 走罐
4. 闪罐
5. 刺血拔罐
6. 放血拔罐
7. Wet cupping
8. Bloodletting and cupping
9. Cupping

10. 系统评价

11. Meta分析

12. 荟萃分析

13. OR/ 1-9

14. OR/10-12

15. 13 AND 14

### **3. Korea Med Korean database**

부항 AND (체계적 문헌고찰 OR 메타분석)

## Supplement 2. Summary of the excluded systematic reviews of cupping therapy.

| First author<br>(year)<br>Country         | Condition<br>Search date<br>No. of primary studies                                                                                                                          | Cupping<br>therapy | Comparator                             | Outcome                                        | Overall<br>risk of<br>bias | Effect estimates for main<br>outcomes (meta-analysis)                                                                                                                                                       | Conclusion<br>(quote from the<br>original paper)                                                                                                                                 | Overall<br>confidence*   |
|-------------------------------------------|-----------------------------------------------------------------------------------------------------------------------------------------------------------------------------|--------------------|----------------------------------------|------------------------------------------------|----------------------------|-------------------------------------------------------------------------------------------------------------------------------------------------------------------------------------------------------------|----------------------------------------------------------------------------------------------------------------------------------------------------------------------------------|--------------------------|
| Wang<br>(2017)<br>[1]<br>China            | Low back pain<br>Aug 2016<br>6 RCTs                                                                                                                                         | All types          | -WM<br>-Usual care                     | 1)VAS<br>2)ODI<br>3)MPPI                       | High                       | 1) SMD -0.73 (-1.42, -0.04),<br>P=0.04<br>2) SMD -3.64 (-5.85, -1.42),<br>P=0.001<br>3) SMD -6.12 (-14.54, 2.31),<br>P=0.15)                                                                                | ...can significantly<br>decrease the VAS and<br>ODI...                                                                                                                           | Potentially<br>effective |
| Huang (2013)<br>[2]<br>China              | Low back pain<br>n.r. 2013<br>7 studies<br>(1 RCT, 6 non-RCTs)                                                                                                              | All types          | -Waiting list<br>-WM                   | Effective rate                                 | High                       | P > 0 .05                                                                                                                                                                                                   | ...is promising for pain<br>control and improves<br>QoL and safe.                                                                                                                | Potentially<br>effective |
| Azizkhani<br>(2018)<br>[3]<br>Iran        | Non-specific neck pain<br>March 2017<br>10 RCTs                                                                                                                             | All types          | -Waiting list<br>-Usual care           | 1)VAS<br>2)NRS<br>3)SF36                       | High                       | 1) SMD -0.84 (-1.22, -0.46),<br>P=0.065<br>2) SMD -0.60 (-0.86, -0.35),<br>P=0.308<br>3) SMD -0.56 (-0.20, -0.92),<br>P=0.083                                                                               | ... improve...neck pain                                                                                                                                                          | Potentially<br>effective |
| Cao<br>(2014)<br>[4]<br>China             | Several conditions<br>Dec 2013<br>16 RCTs<br>Herpes zoster (2 RCTs)<br>Neck pain (4 RCTs)<br>Low back pain (2 RCTs)<br>Osteoarthritis (2 RCTs)<br>Other conditions (6 RCTs) | All types          | -No treatment<br>-Usual care           | 1)VAS<br>2)NRS                                 | High                       | 1) (vs. waiting list)<br>MD -1.85 (-2.66, -1.04),<br>P<0.00001<br>2) (vs. heat therapy)<br>MD -2.05 (-2.93, -1.17),<br>P<0.00001)                                                                           | ... short-term effect on<br>reducing pain...                                                                                                                                     | Potentially<br>effective |
| Kim<br>(2011)<br>[5]<br>Korea             | Several conditions<br>Jan 2009<br>7 RCTs<br>Low back pain (2 RCT)<br>Other conditions (5 RCT)                                                                               | All types          | -Usual care<br>-Analgesia<br>-Heat pad | Pain intensity                                 | High                       | P < 0.01                                                                                                                                                                                                    | More rigorous studies<br>are required ...                                                                                                                                        | Potentially<br>effective |
| Kwon (2007)<br>[6]<br>Korea               | Several conditions<br>Jan 2007<br>5 studies<br>(2 RCT, 3 CCTs)<br>Low back pain (1 RCT)<br>Ankle sprain (1 RCT)                                                             | Wet cupping        | AT                                     | Pain rating scale                              | High                       | WMD 10.45 (1.11, 19.80),<br>P=0.03                                                                                                                                                                          | .... low back pain is<br>effective....                                                                                                                                           | Potentially<br>effective |
| Wood (2020)<br>[7]<br>Australia           | Several conditions<br>April 2018<br>21 RCTs<br>Neck pain (7 RCTs)<br>Low back pain (3 RCTs)<br>Other conditions (11<br>RCTs)                                                | Dry cupping        | -WM<br>-Sham<br>- No treatment         | 1)VAS<br>2)NDI<br>3)Pressure pain<br>threshold | High                       | Neck pain<br>1) MD -21.67 (-36.55, -6.80),<br>P=0.004<br>2) SMD -4.65 (-6.44, -2.85),<br>P<0.0001<br>3) MD -0.40 (-0.69, -0.11),<br>P=0.006<br><br>Low back pain<br>MD -19.38 (-28.09, -10.66),<br>P<0.0001 | ...effective for reducing<br>pain ... definitive<br>conclusions regarding<br>the effectiveness and<br>safety of cupping for<br>musculoskeletal pain ...<br>unable to be made ... | Unclear                  |
| Al Bedah<br>(2016)<br>[8]<br>Saudi Arabia | Several conditions<br>Feb 2016<br>14 RCTs<br>Low back pain (3 RCTs)<br>Neck pain (2 RCTs)<br>Other conditions (9 RCTs)                                                      | Wet cupping        | -No treatment<br>-Active controls      | Pain                                           | High                       | P < 0.01 or P<0.05                                                                                                                                                                                          | ... promising evidence<br>...wet cupping in<br>musculoskeletal pain...                                                                                                           | Potentially<br>effective |
| Lee (2010)b<br>[9]<br>Korea               | Hypertension<br>June 2009<br>2 studies<br>(1 RCT, 1 UOS)                                                                                                                    | All types          | WM                                     | Changes in<br>cerebral vascular<br>function    | High                       | P<0.05                                                                                                                                                                                                      | ...not significantly<br>convincing ...                                                                                                                                           | Unclear                  |
| Li<br>(2020)<br>[10]<br>China             | Psoriasis vulgaris<br>Dec 2019<br>14 RCTs                                                                                                                                   | All types          | -Oral Chinese medicine                 | Effective rate                                 | High                       | RR 3.32 (2.32, 4.75),<br>P<0.00001                                                                                                                                                                          | ... showed that the<br>combined with cupping<br>therapy had obvious<br>advantages ...                                                                                            | Potentially<br>effective |

AT: acupuncture; NDI: Neck Disability Index; NRS: numerical rating scale; MPPI: McGill present pain index; ODI: Oswestry pain disability index;  
QoL: quality of life; RR: risk ratio; RCT: randomized controlled trials; SF36: 36-item short form survey; UOS: uncontrolled observational studies;  
VAS: Visual analog scale; WM: Western medicine; WMD: weighted mean difference.

### Supplement 3. Quality assessment of all excluded systematic reviews using AMSTAR 2.

| Study ID            | 1   | 2   | 3   | 4   | 5   | 6   | 7  | 8   | 9   | 10  | 11    | 12    | 13  | 14    | 15    | 16  | Rating overall confidence* |
|---------------------|-----|-----|-----|-----|-----|-----|----|-----|-----|-----|-------|-------|-----|-------|-------|-----|----------------------------|
| Wang (2017)[1]      | Yes | No  | Yes | Yes | Yes | Yes | No | Yes | Yes | Yes | Yes   | Yes   | Yes | No    | No    | Yes | Low                        |
| Huang (2013)[2]     | Yes | No  | Yes | No  | No  | No  | No | Yes | No  | No  | No-MA | No-MA | Yes | No-MA | No-MA | Yes | Critically low             |
| Azizkhani (2018)[3] | Yes | No  | No  | Yes | No  | Yes | No | Yes | Yes | No  | Yes   | Yes   | Yes | No    | No    | No  | Low                        |
| Cao (2014)[4]       | Yes | Yes | Yes | Yes | Yes | Yes | No | Yes | Yes | Yes | Yes   | Yes   | Yes | No    | Yes   | Yes | Moderate                   |
| Kim (2011)[5]       | No  | No  | Yes | Yes | Yes | Yes | No | Yes | Yes | Yes | No-MA | No-MA | Yes | No-MA | No-MA | No  | Critically low             |
| Kwon (2007)[6]      | No  | No  | Yes | Yes | No  | Yes | No | Yes | Yes | No  | Yes   | Yes   | Yes | No    | No    | No  | Critically low             |
| Wood (2020)[7]      | Yes | Yes | Yes | Yes | Yes | Yes | No | Yes | Yes | No  | Yes   | Yes   | Yes | No    | Yes   | Yes | Moderate                   |
| Al Bedah (2016)[8]  | Yes | No  | Yes | Yes | Yes | Yes | No | Yes | Yes | No  | No-MA | No-MA | Yes | No-MA | No-MA | Yes | Critically low             |
| Lee (2010)b[9]      | No  | No  | No  | Yes | Yes | Yes | No | Yes | Yes | Yes | No-MA | No-MA | Yes | No-MA | No-MA | Yes | Critically low             |
| Li (2020)[10]       | Yes | No  | Yes | Yes | Yes | Yes | No | Yes | Yes | Yes | Yes   | Yes   | Yes | No    | Yes   | No  | Low                        |

AMSTAR 2: A MeaSurement Tool to Assess systematic Reviews 2; No-MA: No meta-analysis conducted. 1. components of PICO/ 2. established prior to the conduct of the review/ 3. explain their selection of the study designs/ 4. comprehensive search/ 5. duplicate selection/ 6. duplicate extraction/ 7. list of excluded studies and justify the exclusions/ 8. describe the included studies in adequate detail/ 9. use a satisfactory technique for assessing the risk of bias (RoB)/ 10. report on the sources of funding/ 11. use appropriate methods for statistical combination of results/ 12. assess the potential impact of RoB in individual studies on the results/ 13. account for RoB in individual studies when interpreting/ discussing the results of the review/ 14. Did the review authors provide a satisfactory explanation for, and discussion of, any heterogeneity observed in the results of the review/ 15. Publication bias assessed/ 16. Include conflict of interest. \*AMSTAR2 was used to critically appraise the reporting quality of each included SR. The overall confidence of each SR was graded as “high”, “moderate”, “low”, “critically low”.

## References

1. Wang, Y.T.; Qi, Y.; Tang, F.Y.; Li, F.M.; Li, Q.H.; Xu, C.P.; Xie, G.P.; Sun, H.T. The effect of cupping therapy for low back pain: A meta-analysis based on existing randomized controlled trials. *Journal of back and musculoskeletal rehabilitation* 2017, 30, 1187-1195, doi:10.3233/bmr-169736.
2. Huang, C.Y.; Choong, M.Y.; Li, T.S. Effectiveness of cupping therapy for low back pain: a systematic review. *Acupuncture in medicine : journal of the British Medical Acupuncture Society* 2013, 31, 336-337, doi:10.1136/acupmed-2013-010385.
3. Azizkhani, M.; Ghorat, F.; Soroushzadeh, S.M.A.; Karimi, M.; Yekaninejad, S. The effect of cupping therapy on non-specific neck pain: a systematic review and meta-analysis. *Iranian Red Crescent Medical Journal* 2018, 20, doi:10.5812/ircmj.55039.
4. Cao, H.; Li, X.; Yan, X.; Wang, N.S.; Bensoussan, A.; Liu, J. Cupping therapy for acute and chronic pain management: A systematic review of randomized clinical trials. *Journal of Traditional Chinese Medical Sciences* 2014, 1, 49-61, doi:10.1016/j.jtcms.2014.11.003.
5. Kim, J.I.; Lee, M.S.; Lee, D.H.; Boddy, K.; Ernst, E. Cupping for treating pain: a systematic review. *Evidence-based complementary and alternative medicine : eCAM* 2011, 2011, 467014, doi:10.1093/ecam/nep035.
6. Kwon, Y.D.; Cho, H.J. Systematic review of cupping including bloodletting therapy for musculoskeletal diseases in Korea. *Korean J Orient Physiology Pathology* 2007, 21, 789-793.
7. Wood, S.; Fryer, G.; Tan, L.L.F.; Cleary, C. Dry cupping for musculoskeletal pain and range of motion: A systematic review and meta-analysis. *J Bodyw Mov Ther* 2020, 24, 503-518, doi:10.1016/j.jbmt.2020.06.024.
8. Al Bedah, A.M.; Khalil, M.K.; Posadzki, P.; Sohaibani, I.; Aboushanab, T.S.; AlQaed, M.; Ali, G.I. Evaluation of wet cupping therapy: Systematic review of randomized clinical trials. *Journal of alternative and complementary medicine (New York, N.Y.)* 2016, 22, 768-777, doi:10.1089/acm.2016.0193.
9. Lee, M.S.; Choi, T.Y.; Shin, B.C.; Kim, J.I.; Nam, S.S. Cupping for hypertension: a systematic review. *Clinical and experimental hypertension (New York, N.Y. : 1993)* 2010, 32, 423-425, doi:10.3109/10641961003667955.
10. Li, M.; Zhao, Y.; Laing, X.; Hu, M.; Yan, X.; Zhao, L. Meta analysis of efficacy of combined with cupping therapy in psoriasis vulgaris. *World Clinical Drugs* 2020, 41, 711-718, 741.
